# Supplementary material for: External Validation of a Novel Comprehensive Trifecta System in Predicting Oncologic and Functional Outcomes of Partial Nephrectomy: Results of a Multicentric Series
Source: MDPI journal article supplement (doi:10.3390/jcm11030796), 2022-02-01
Supplement: s1 [file s1]

**Supplementary Table S1. Cox regression predicting overall mortality, in the original series [12] and in the external validation cohort\*.**

| Variable                          | Univariable analysis |          |        |         | Multivariable analysis |          |        |         |
|-----------------------------------|----------------------|----------|--------|---------|------------------------|----------|--------|---------|
|                                   | HR                   | 95.0% CI |        |         | HR                     | 95.0% CI |        |         |
|                                   |                      | Lower    | Higher | p value |                        | Lower    | Higher | p value |
| <b>Age</b>                        | 1.04                 | 1.01     | 1.07   | 0.02    | 1.04                   | 1.01     | 1.08   | 0.01    |
| <b>Gender</b>                     | 0.80                 | 0.36     | 1.75   | 0.578   | -                      | -        | -      | -       |
| <b>Diabetes</b>                   | 1.19                 | 0.36     | 3.96   | 0.769   | -                      | -        | -      | -       |
| <b>Hypertension</b>               | 1.13                 | 0.54     | 2.35   | 0.739   | -                      | -        | -      | -       |
| <b>ASA score</b>                  |                      |          |        |         |                        |          |        |         |
| 1-2                               | 0.89                 | 0.34     | 2.36   | 0.829   | -                      | -        | -      | -       |
| 3-4                               |                      |          |        |         |                        |          |        |         |
| <b>pT stage</b>                   | 0.85                 | 0.31     | 2.29   | 0.756   | -                      | -        | -      | -       |
| <b>RENAL (cat)</b>                |                      |          |        |         | -                      | -        | -      | -       |
| 4-6 vs 7-9                        | 1.06                 | 0.45     | 2.49   | 0.884   |                        |          |        |         |
| 4-6 vs 10-12                      | 1.55                 | 0.51     | 4.75   | 0.435   |                        |          |        |         |
| <b>Preoperative<br/>CKD stage</b> | 0.52                 | 0.11     | 2.38   | 0.403   | -                      | -        | -      | -       |
| <b>Trifecta</b>                   | 0.42                 | 0.19     | 0.91   | 0.029   | 0.34                   | 0.15     | 0.76   | 0.009   |

**Supplementary Table S2. Cox regression predicting CSS survival, in the original series [12] and in the external validation cohort\*.**

|                                 | Multivariable Cox regression model |        |                     |        |                              |       |                     |       |
|---------------------------------|------------------------------------|--------|---------------------|--------|------------------------------|-------|---------------------|-------|
|                                 | Development cohort *               |        |                     |        | Externally validation cohort |       |                     |       |
|                                 | Restricted model                   |        | Full model          |        | Restricted model             |       | Full model          |       |
| Variable                        | HR<br>(95%IC)                      | p      | HR<br>(95%IC)       | p      | HR<br>(95%IC)                | p     | HR<br>(95%IC)       | p     |
| <b>Trifecta<br/>(yes vs no)</b> | -                                  | -      | 0.79<br>(0.35-1.79) | 0.572  | -                            | -     | 0.41<br>(0.35-1.19) | 0.008 |
| <b>WIT</b>                      | 1.08<br>(0.99-1.17)                | 0.071  | 1.07<br>(0.99-1.16) | 0.081  | 1.05<br>(1.01-1.09)          | 0.028 | 1.04<br>(0.99-1.16) | 0.039 |
| <b>Tumor size</b>               | 0.97<br>(0.93-1.01)                | 0.095  | 0.97<br>(0.93-1.01) | 0.107  | 1.00<br>(0.83-1.22)          | 0.962 | 1.00<br>(0.93-1.01) | 0.996 |
| <b>Preop. eGFR</b>              | 0.99<br>(0.98-1.01)                | 0.353  | 0.99<br>(0.98-1.01) | 0.353  | 1.00<br>(0.99-1.02)          | 0.777 | 1.00<br>(0.98-1.01) | 0.922 |
| <b>RENAL</b>                    | 1.42<br>(1.19-1.70)                | <0.001 | 1.42<br>(1.19-1.70) | <0.001 | 1.02<br>(0.87-1.20)          | 0.813 | 1.04<br>(1.19-1.70) | 0.634 |
| <b>Off-clamp</b>                | 5.90<br>(1.1 – 32.8)               | 0.043  | 5.69<br>(1.02-31.7) | 0.048  | 2.86<br>(0.88-9.31)          | 0.081 | 2.73<br>(1.02-31.7) | 0.094 |

\* This matched exactly the results from Brasseti et al [12]. Adjusted for malignant lesions only.

**Supplementary Table S3. Cox regression predicting newly onset of CKD $\geq$ 3b, in the original series [12] and in the external validation cohort\*.**

|                                 | <b>Multivariable Cox regression model</b> |                |                   |          |                                     |                |                   |          |
|---------------------------------|-------------------------------------------|----------------|-------------------|----------|-------------------------------------|----------------|-------------------|----------|
|                                 | <b>Development cohort *</b>               |                |                   |          | <b>Externally validation cohort</b> |                |                   |          |
|                                 | <b>Restricted model</b>                   |                | <b>Full model</b> |          | <b>Restricted model</b>             |                | <b>Full model</b> |          |
| <b>Variable</b>                 | <b>HR 95%IC</b>                           | <b>p-value</b> | <b>HR 95%IC</b>   | <b>p</b> | <b>HR 95%IC</b>                     | <b>p-value</b> | <b>HR 95%IC</b>   | <b>p</b> |
| <b>Trifecta<br/>(yes vs no)</b> | -                                         | -              | 0.35 (0.19-0.62)  | <0.001   | -                                   | -              | 0.59 (0.36-0.96)  | 0.034    |
| <b>WIT</b>                      | 1.02 (0.99-1.05)                          | 0.081          | 1.01 (0.98-1.03)  | 0.947    | 1.04 (1.01-1.07)                    | 0.021          | 1.03 (1.01-1.07)  | 0.028    |
| <b>Preop. eGFR</b>              | 0.95 (0.94-0.97)                          | <0.001         | 0.95 (0.94-0.96)  | <0.001   | 0.99 (0.98-0.99)                    | 0.013          | 0.99 (0.98-0.99)  | 0.013    |
| <b>Off-clamp</b>                | 1.11 (0.44- 2.80)                         | 0.833          | 0.82 (0.32-2.15)  | 0.690    | 1.63 (0.72-3.70)                    | 0.246          | 1.56 (0.70-3.63)  | 0.266    |
| <b>Age</b>                      | 1.01 (0.99-1.04)                          | 0.250          | 1.01 (0.99-1.04)  | 0.398    | 1.01 (0.98-1.02)                    | 0.904          | 1.01 (0.98-1.03)  | 0.745    |
| <b>BMI</b>                      | 1.01 (0.97-1.06)                          | 0.529          | 1.01 (0.965-1.06) | 0.697    | 1.04 (0.98-1.09)                    | 0.191          | 1.03 (0.98-1.09)  | 0.214    |
| <b>ASA</b>                      | 1.40 (0.95-2.05)                          | 0.087          | 1.43 (0.99-2.13)  | 0.079    | 1.19 (0.82-1.73)                    | 0.355          | 1.21 (0.83-1.74)  | 0.320    |
| <b>RENAL</b>                    | 1.18 (1.09-1.37)                          | 0.028          | 1.22 (1.05-1.41)  | 0.009    | 1.07 (0.96-1.19)                    | 0.211          | 1.09 (0.97-1.21)  | 0.140    |

\* This matched exactly the results from Brassetti et al [12].
